# Supplementary material for: A DFT study on structure, stabilities and electronic properties of double magnesium doped gold clusters
Source: Royal Society of Chemistry journal article supplement (doi:10.1039/c4ra07095j), 2014-01-01
Supplement: c4ra07095j1.pdf [file c4ra07095j1.pdf]

## Electronic Supplementary Information (ESI)

### **A DFT study on structure, stabilities and electronic properties of double Magnesium doped Gold clusters**

Debajyoti Bhattacharjee, Bhupesh Kr. Mishra and Ramesh Ch. Deka\*

Department of Chemical Sciences, Tezpur University, Napaam, Tezpur, Assam 784 028,  
India

\*Corresponding author, Fax: +91 3712267005. Email address: [ramesh@tezu.ernet.in](mailto:ramesh@tezu.ernet.in) (R.C.D.)

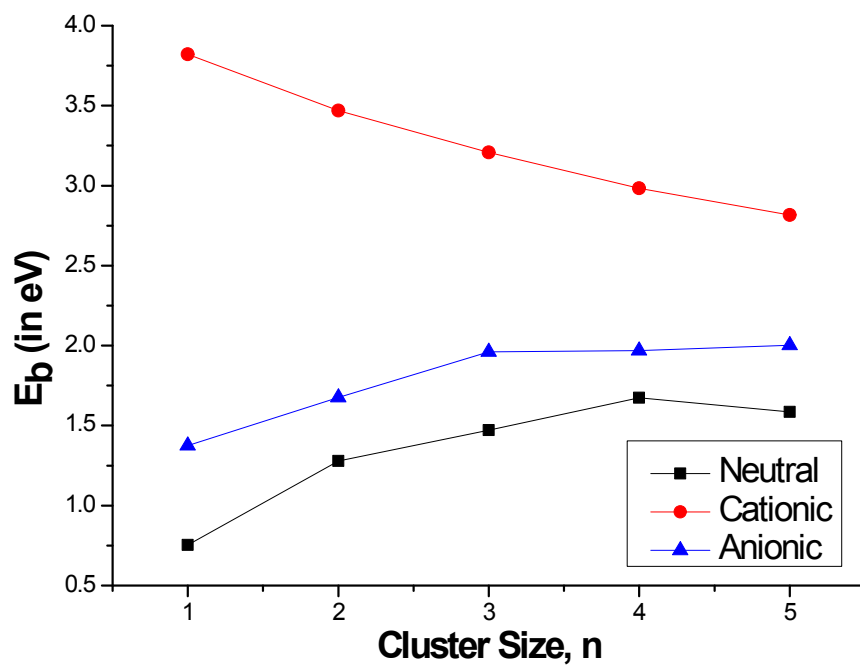

Fig. S1 Comparison of binding energy per atom among charge and neutral clusters of  $Au_nMg_2$  clusters.

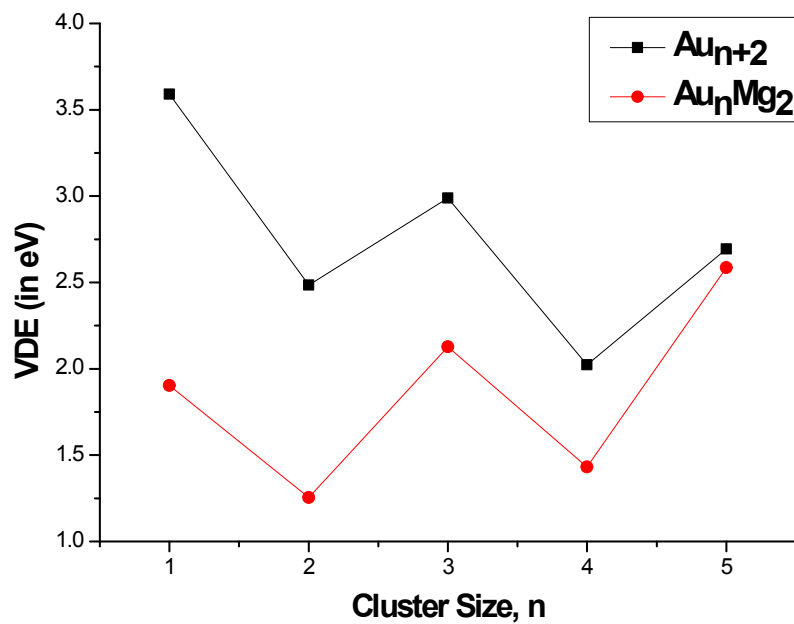

Fig. S2 Variation of VDE values with respect to cluster size for pure and Mg doped Au clusters.

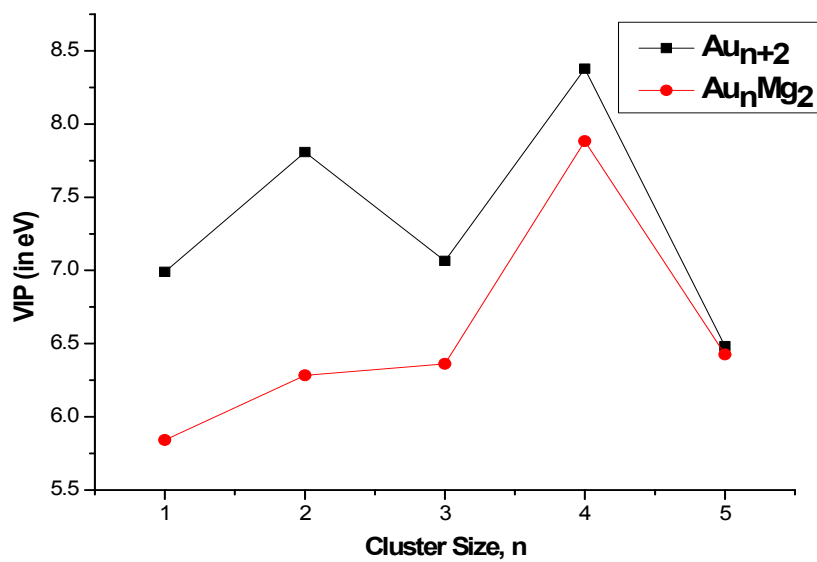

Fig. S3 Variation of VIP values with respect to cluster size for pure and Mg doped Au clusters.

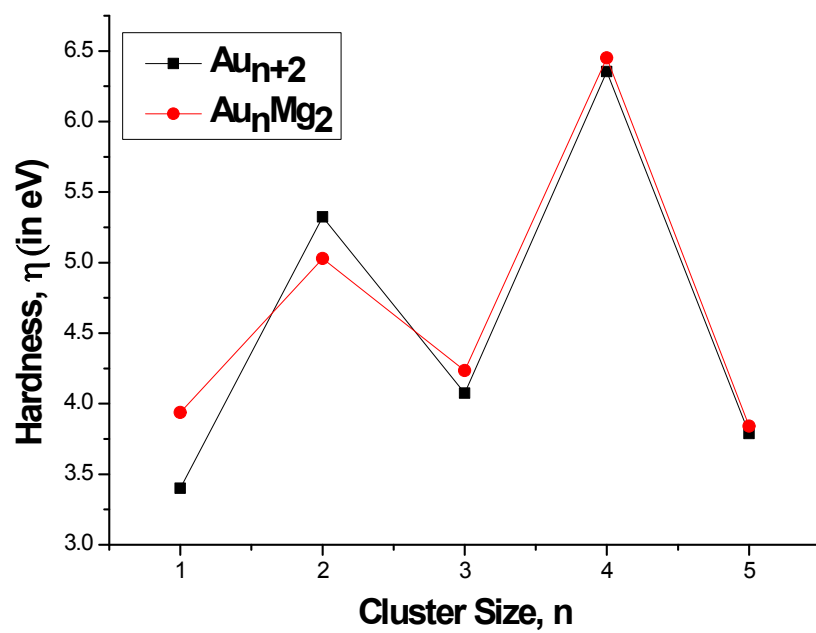

Fig. S4 Variation of hardness values with respect to cluster size for pure and Mg doped Au clusters.

Table S1 Electron density,  $\rho$  and the Laplacian of electron density,  $\nabla^2\rho$  at the bond critical points (BCP) for the clusters with  $n>2$

| Cluster         | Interaction | $\rho$ | $\nabla^2\rho$ |
|-----------------|-------------|--------|----------------|
| <b>Neutral</b>  |             |        |                |
| Au <sub>5</sub> | Au2 - Au4   | 0.05   | 0.11           |
|                 | Au1 - Au2   | 0.05   | 0.12           |
|                 | Au2 - Au3   | 0.05   | 0.12           |
|                 | Au1 - Au4   | 0.06   | 0.13           |
|                 | Au3 - Au4   | 0.05   | 0.11           |
|                 | Au3 - Au5   | 0.05   | 0.12           |
|                 | Au4 - Au5   | 0.06   | 0.13           |
| Au <sub>6</sub> | Au1 - Au3   | 0.04   | 0.1            |
|                 | Au1 - Au2   | 0.06   | 0.13           |
|                 | Au2 - Au3   | 0.06   | 0.13           |
|                 | Au3 - Au5   | 0.04   | 0.1            |
|                 | Au3 - Au4   | 0.06   | 0.13           |
|                 | Au1 - Au5   | 0.04   | 0.1            |
|                 | Au4 - Au5   | 0.06   | 0.13           |
|                 | Au1 - Au6   | 0.06   | 0.13           |
| Au5 - Au6       | 0.06        | 0.13   |                |
| Au <sub>7</sub> | Au1 - Au2   | 0.05   | 0.12           |
|                 | Au2 - Au7   | 0.05   | 0.12           |
|                 | Au2 - Au3   | 0.05   | 0.11           |
|                 | Au1 - Au7   | 0.05   | 0.12           |
|                 | Au1 - Au4   | 0.05   | 0.11           |
|                 | Au5 - Au7   | 0.05   | 0.12           |
|                 | Au4 - Au5   | 0.05   | 0.11           |

|                                 |           |      |      |
|---------------------------------|-----------|------|------|
|                                 | Au6 - Au7 | 0.05 | 0.12 |
|                                 | Au3 - Au6 | 0.05 | 0.11 |
|                                 | Au5 - Au6 | 0.05 | 0.12 |
|                                 | Au3 - Au7 | 0.04 | 0.09 |
|                                 | Au4 - Au7 | 0.04 | 0.09 |
| Au <sub>3</sub> Mg <sub>2</sub> | Au1 - Mg4 | 0.03 | 0.1  |
|                                 | Au2 - Mg4 | 0.04 | 0.15 |
|                                 | Au3 - Mg4 | 0.03 | 0.1  |
|                                 | Au1 - Mg5 | 0.03 | 0.1  |
|                                 | Au3 - Mg5 | 0.03 | 0.1  |
| Au <sub>4</sub> Mg <sub>2</sub> | Au1 - Mg5 | 0.03 | 0.11 |
|                                 | Au3 - Mg5 | 0.03 | 0.11 |
|                                 | Au4 - Mg5 | 0.04 | 0.15 |
|                                 | Au1 - Mg6 | 0.03 | 0.11 |
|                                 | Au2 - Mg6 | 0.04 | 0.15 |
|                                 | Au3 - Mg6 | 0.03 | 0.11 |
| Au <sub>5</sub> Mg <sub>2</sub> | Au3 - Mg7 | 0.03 | 0.1  |
|                                 | Au2 - Au3 | 0.04 | 0.08 |
|                                 | Au3 - Au4 | 0.05 | 0.12 |
|                                 | Au1 - Mg7 | 0.02 | 0.09 |
|                                 | Au1 - Mg5 | 0.03 | 0.11 |
|                                 | Au2 - Mg7 | 0.02 | 0.09 |
|                                 | Au2 - Mg5 | 0.03 | 0.11 |
|                                 | Au6 - Mg7 | 0.03 | 0.1  |
|                                 | Au1 - Au6 | 0.04 | 0.08 |
|                                 | Au4 - Au6 | 0.05 | 0.12 |
|                                 | Au4 - Mg7 | 0.03 | 0.1  |

**Cationic**

|                 |                 |           |      |
|-----------------|-----------------|-----------|------|
| Au <sub>5</sub> | Au1 - Au2       | 0.06      | 0.14 |
|                 | Au1 - Au4       | 0.05      | 0.11 |
|                 | Au2 - Au4       | 0.05      | 0.11 |
|                 | Au3 - Au4       | 0.05      | 0.11 |
|                 | Au3 - Au5       | 0.06      | 0.14 |
|                 | Au4 - Au5       | 0.05      | 0.11 |
|                 | Au <sub>6</sub> | Au1 - Au3 | 0.05 |
| Au1 - Au2       |                 | 0.06      | 0.11 |
| Au2 - Au3       |                 | 0.06      | 0.13 |
| Au3 - Au5       |                 | 0.03      | 0.08 |
| Au3 - Au4       |                 | 0.06      | 0.12 |
| Au1 - Au5       |                 | 0.05      | 0.11 |
| Au4 - Au5       |                 | 0.06      | 0.12 |
| Au1 - Au6       |                 | 0.06      | 0.11 |
| Au5 - Au6       |                 | 0.06      | 0.13 |
| Au <sub>7</sub> | Au1 - Au2       | 0.05      | 0.12 |
|                 | Au2 - Au3       | 0.05      | 0.12 |
|                 | Au1 - Au4       | 0.05      | 0.12 |
|                 | Au4 - Au5       | 0.05      | 0.12 |
|                 | Au3 - Au6       | 0.05      | 0.12 |
|                 | Au5 - Au6       | 0.05      | 0.12 |
|                 | Au1 - Au7       | 0.05      | 0.11 |
|                 | Au2 - Au7       | 0.05      | 0.11 |
|                 | Au3 - Au7       | 0.05      | 0.11 |
|                 | Au4 - Au7       | 0.05      | 0.11 |



|                |           |      |      |
|----------------|-----------|------|------|
|                | Au5 - Au7 | 0.05 | 0.11 |
|                | Au6 - Au7 | 0.05 | 0.11 |
| $Au_3Mg_2$     | Au1 - Mg4 | 0.04 | 0.14 |
|                | Au3 - Mg4 | 0.04 | 0.14 |
|                | Au1 - Mg5 | 0.02 | 0.08 |
|                | Au2 - Mg5 | 0.04 | 0.16 |
|                | Au3 - Mg5 | 0.02 | 0.08 |
| $Au_4Mg_2$     | Au1 - Mg4 | 0.04 | 0.14 |
|                | Au3 - Mg4 | 0.04 | 0.14 |
|                | Au1 - Mg5 | 0.02 | 0.08 |
|                | Au2 - Mg5 | 0.04 | 0.16 |
|                | Au3 - Mg5 | 0.02 | 0.08 |
| $Au_5Mg_2$     | Au3 - Mg7 | 0.02 | 0.07 |
|                | Au2 - Au3 | 0.03 | 0.06 |
|                | Au3 - Au4 | 0.06 | 0.13 |
|                | Au1 - Mg7 | 0.02 | 0.09 |
|                | Au1 - Mg5 | 0.04 | 0.14 |
|                | Au2 - Mg7 | 0.02 | 0.09 |
|                | Au2 - Mg5 | 0.04 | 0.14 |
|                | Au6 - Mg7 | 0.02 | 0.07 |
|                | Au1 - Au6 | 0.03 | 0.06 |
|                | Au4 - Au6 | 0.06 | 0.13 |
|                | Au4 - Mg7 | 0.03 | 0.12 |
| <b>Anionic</b> |           |      |      |
| $Au_5$         | Au2 - Au4 | 0.04 | 0.1  |
|                | Au1 - Au2 | 0.04 | 0.1  |

|                                 |           |      |      |
|---------------------------------|-----------|------|------|
|                                 | Au2 - Au3 | 0.06 | 0.14 |
|                                 | Au1 - Au4 | 0.06 | 0.13 |
|                                 | Au3 - Au4 | 0.04 | 0.1  |
|                                 | Au3 - Au5 | 0.04 | 0.1  |
|                                 | Au4 - Au5 | 0.06 | 0.13 |
| Au <sub>6</sub>                 | Au1 - Au3 | 0.05 | 0.11 |
|                                 | Au1 - Au2 | 0.05 | 0.11 |
|                                 | Au2 - Au3 | 0.05 | 0.11 |
|                                 | Au3 - Au5 | 0.05 | 0.11 |
|                                 | Au3 - Au4 | 0.05 | 0.11 |
|                                 | Au1 - Au5 | 0.05 | 0.11 |
|                                 | Au4 - Au5 | 0.05 | 0.11 |
|                                 | Au1 - Au6 | 0.05 | 0.11 |
|                                 | Au5 - Au6 | 0.05 | 0.11 |
| Au <sub>7</sub>                 | Au1 - Au7 | 0.06 | 0.13 |
|                                 | Au1 - Au2 | 0.05 | 0.12 |
|                                 | Au2 - Au7 | 0.05 | 0.12 |
|                                 | Au2 - Au3 | 0.02 | 0.06 |
|                                 | Au1 - Au4 | 0.06 | 0.13 |
|                                 | Au5 - Au7 | 0.05 | 0.12 |
|                                 | Au4 - Au5 | 0.02 | 0.06 |
|                                 | Au6 - Au7 | 0.06 | 0.13 |
|                                 | Au3 - Au6 | 0.06 | 0.13 |
|                                 | Au5 - Au6 | 0.05 | 0.12 |
|                                 | Au3 - Au7 | 0.03 | 0.07 |
|                                 | Au4 - Au7 | 0.03 | 0.07 |
| Au <sub>3</sub> Mg <sub>2</sub> | Au1 - Mg4 | 0.03 | 0.09 |

|                                 |           |      |      |
|---------------------------------|-----------|------|------|
|                                 | Au2 - Mg4 | 0.03 | 0.09 |
|                                 | Au3 - Mg4 | 0.03 | 0.09 |
|                                 | Au1 - Mg5 | 0.03 | 0.09 |
|                                 | Au2 - Mg5 | 0.03 | 0.09 |
|                                 | Au3 - Mg5 | 0.03 | 0.09 |
| Au <sub>4</sub> Mg <sub>2</sub> | Au1 - Mg5 | 0.03 | 0.08 |
|                                 | Au3 - Mg5 | 0.03 | 0.08 |
|                                 | Au4 - Mg5 | 0.03 | 0.13 |
|                                 | Au1 - Mg6 | 0.03 | 0.08 |
|                                 | Au2 - Mg6 | 0.03 | 0.13 |
|                                 | Au3 - Mg6 | 0.03 | 0.08 |
|                                 | Au1 - Au3 | 0.02 | 0.05 |
| Au <sub>5</sub> Mg <sub>2</sub> | Au3 - Mg7 | 0.03 | 0.11 |
|                                 | Au2 - Au3 | 0.04 | 0.09 |
|                                 | Au3 - Au4 | 0.05 | 0.1  |
|                                 | Au1 - Mg7 | 0.02 | 0.08 |
|                                 | Au1 - Mg5 | 0.03 | 0.09 |
|                                 | Au2 - Mg7 | 0.02 | 0.08 |
|                                 | Au2 - Mg5 | 0.03 | 0.09 |
|                                 | Au6 - Mg7 | 0.03 | 0.11 |
|                                 | Au1 - Au6 | 0.04 | 0.09 |
|                                 | Au4 - Au6 | 0.05 | 0.1  |
|                                 | Au4 - Mg7 | 0.02 | 0.09 |

---

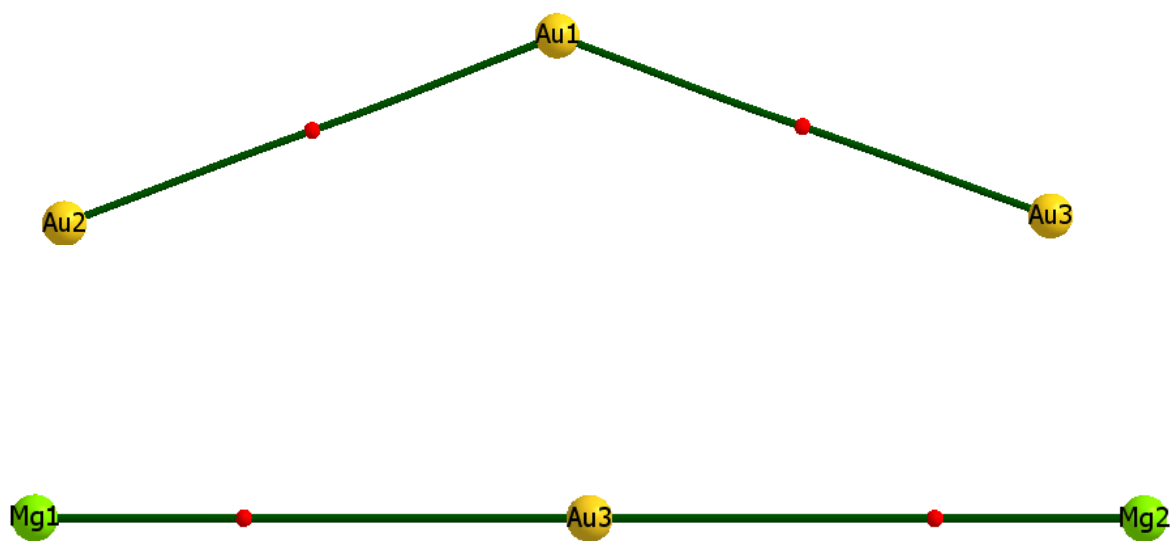

Fig. S5 Shifting of BCP in Au-Au and Au-Mg bonds. The red dots indicate BCP.
